# Supplementary material for: PRMT2 links histone H3R8 asymmetric dimethylation to oncogenic activation and tumorigenesis of glioblastoma
Source: PubMed Central journal article supplement (PMC6208368; doi:10.1038/s41467-018-06968-7), 2018-10-31
Supplement: 41467_2018_6968_MOESM1_ESM.pdf [file 41467_2018_6968_MOESM1_ESM.pdf]

**Supplementary Information (12 Figures, 2 tables) for**

*PRMT2 links histone H3R8 asymmetric dimethylation to oncogenic activation and*

*tumorigenesis of glioblastoma*

Dong.et.al

## Supplementary Fig.1

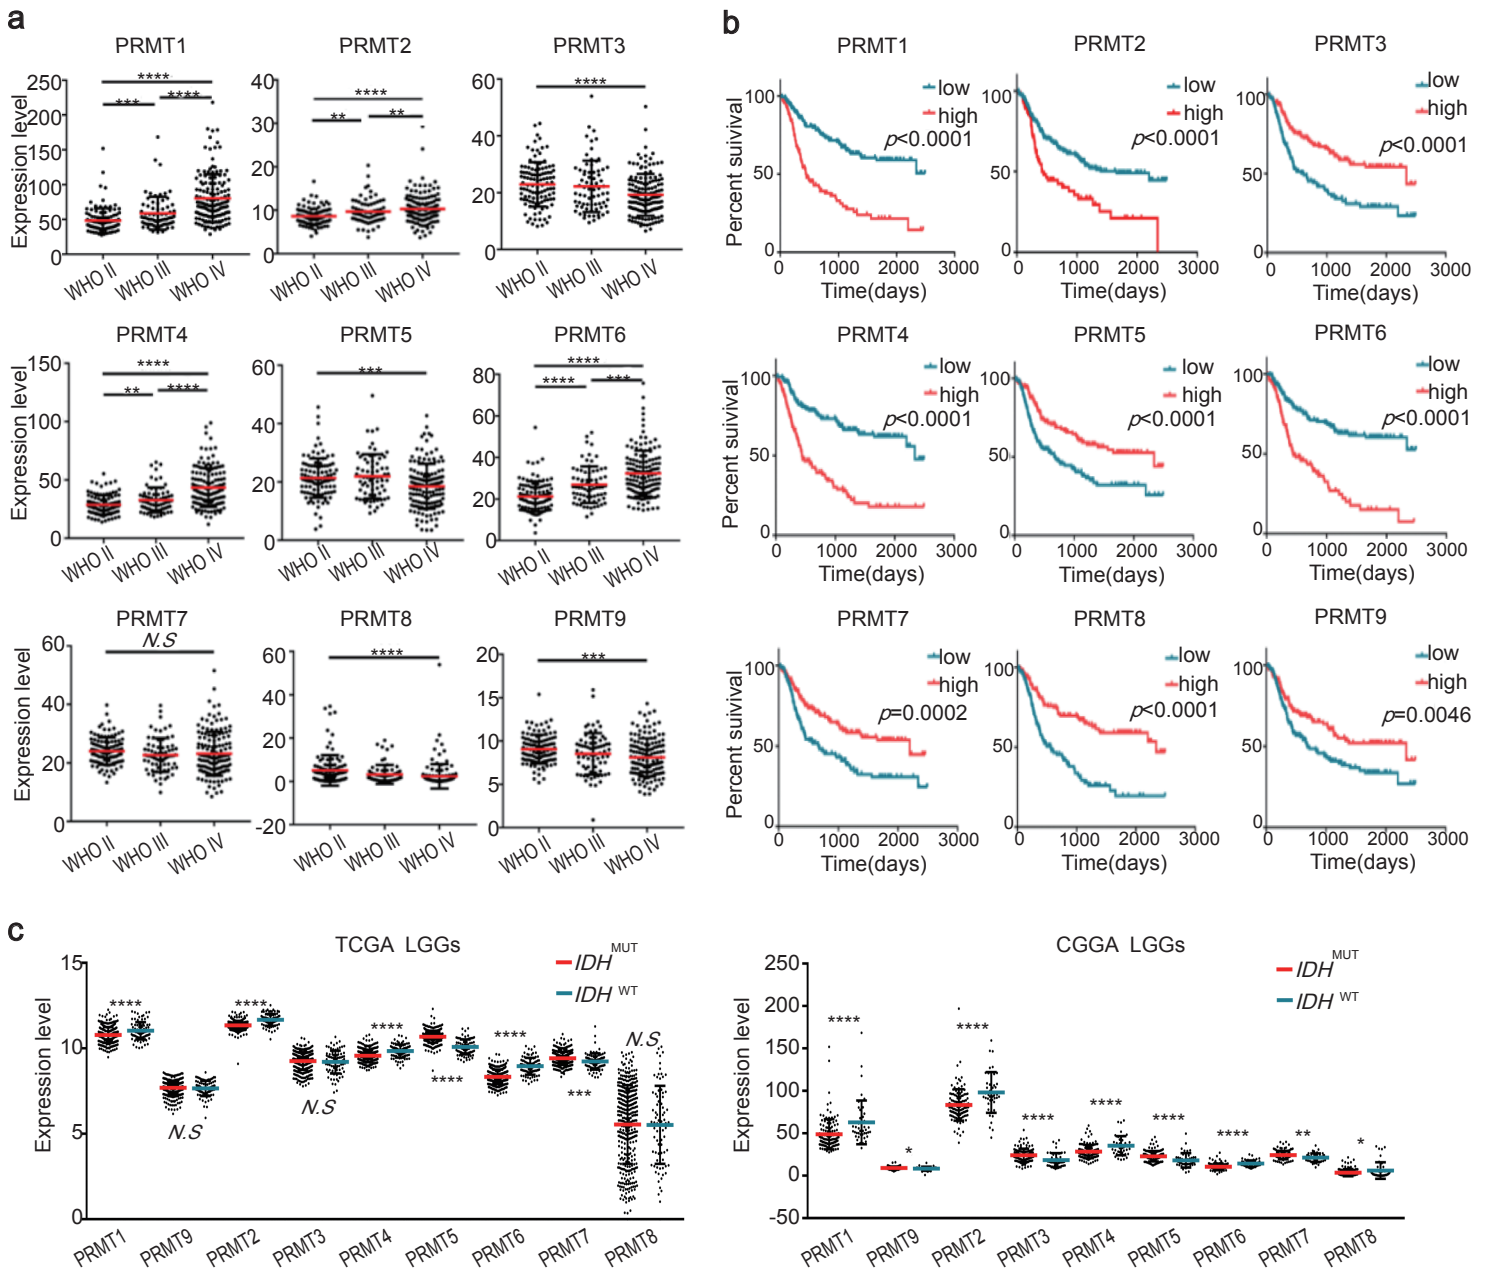

**Supplementary Fig. 1** The expression levels of PRMT gene family members in different grade of gliomas and significance in prognosis. **(a)** The expression levels of PRMTs were analyzed in different grade of glioma tissues according to CGGA dataset. Significance level was determined using One-way ANOVA followed by Dunnett's multiple comparisons test.  $*p \leq 0.05$ ,  $**p \leq 0.01$ ,  $***p \leq 0.001$  and  $****p \leq 0.0001$ . **(b)** Kaplan-Meier survival analyses for correlation between PRMT mRNA expression and survival of glioma patients in the CCGA dataset. **(c)** The mRNA levels of PRMTs were compared between  $IDH^{WT}$  or  $IDH^{MUT}$  glioma tissues in TCGA dataset (Left panel) and CGGA dataset (Right panel).

## Supplementary Fig.2

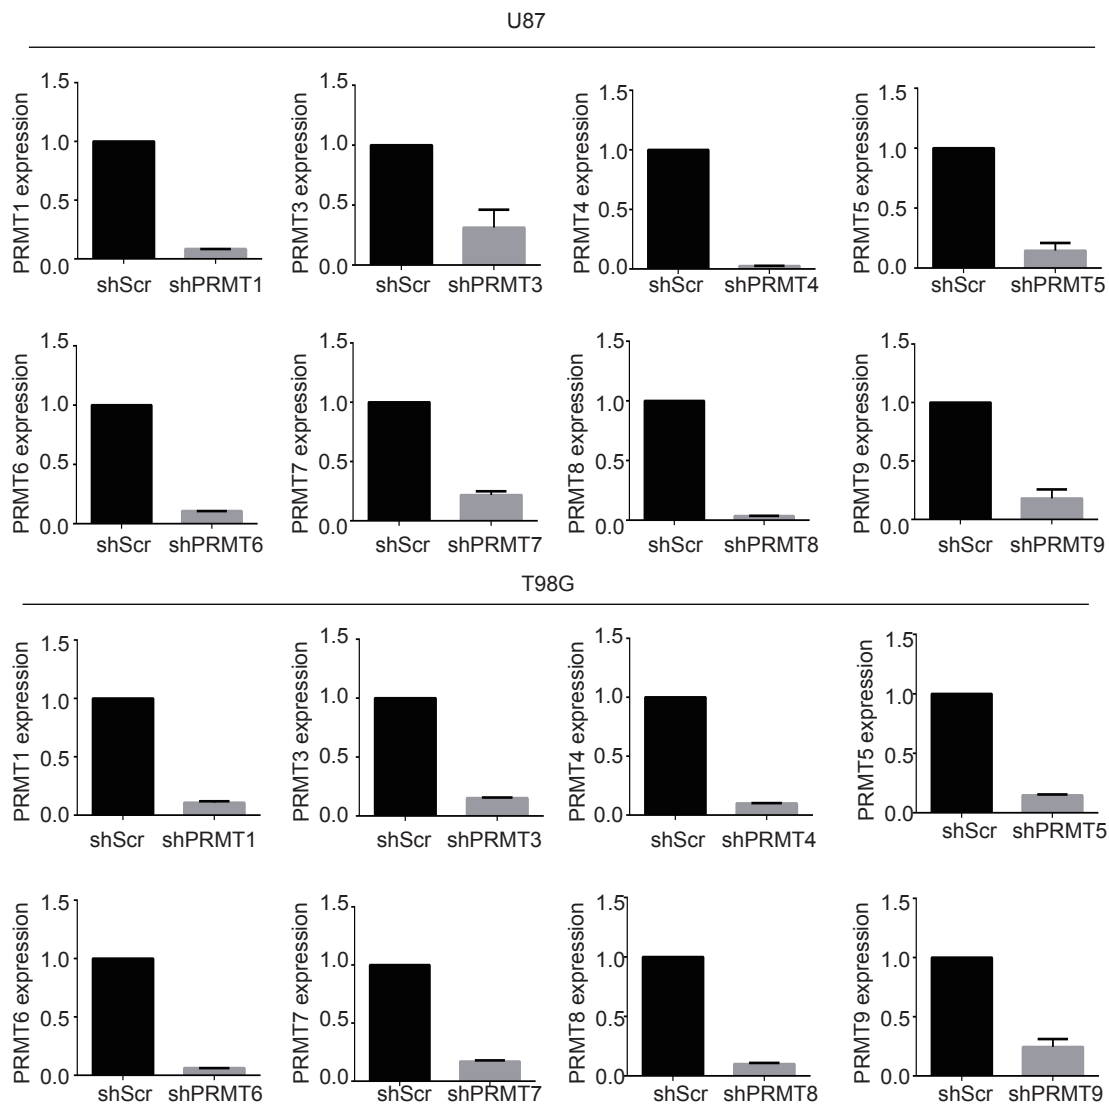

**Supplementary Fig. 2** Validation of knockdown effects. qRT-PCR analysis of the knockdown effects for each PRMT gene expression by designated shRNAs in U87 and T98G cells

### Supplementary Fig.3

**a**

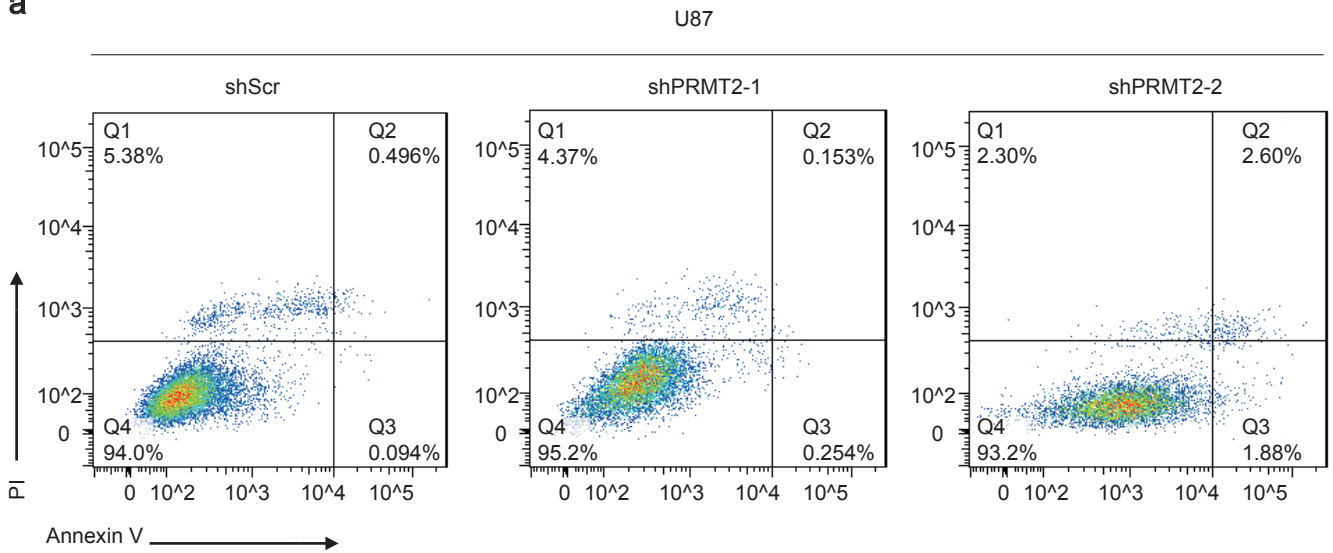

**b**

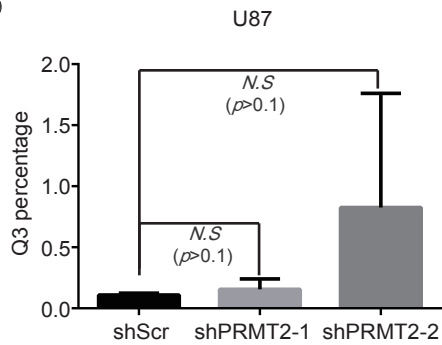

**Supplementary Fig. 3** PRMT2 depletion does not result in cell apoptosis. **(a)** U87 cells were treated as indicated and cell apoptosis was assessed by flow cytometry. **(b)** A rigorous statistical analysis by Student's two-sided *t*-tests about apoptosis has been showed.

## Supplementary Fig.4

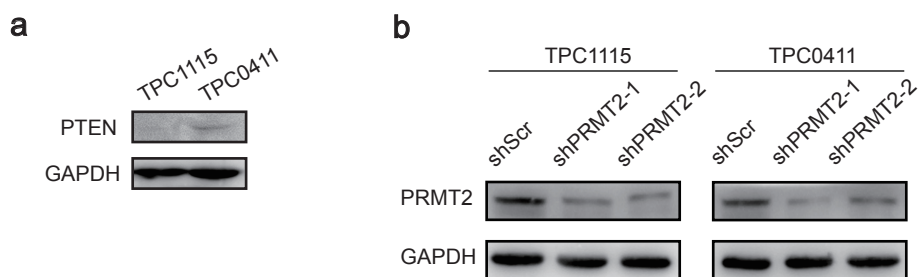

**Supplementary Fig. 4** The PTEN status (**a**) and the efficiency of PRMT2 knockdown (**b**) were indicated in TPC1115 and TPC0411 cells through western blot analysis.

## Supplementary Fig.5

a

| Stem Cell Frequency | U87   |           |           | T98G  |           |           |
|---------------------|-------|-----------|-----------|-------|-----------|-----------|
|                     | shScr | shPRMT2-1 | shPRMT2-1 | shScr | shPRMT2-1 | shPRMT2-1 |
| Lower               | 1/14  | 1/103     | 1/285     | 1/12  | 1/87      | 1/47      |
| Estimate            | 1/11  | 1/83      | 1/212     | 1/9   | 1/69      | 1/39      |
| Upper               | 1/9   | 1/67      | 1/157     | 1/8   | 1/55      | 1/32      |

  

| Stem Cell Frequency | TPC1115 |           |           | TPC0411 |           |           |
|---------------------|---------|-----------|-----------|---------|-----------|-----------|
|                     | shScr   | shPRMT2-1 | shPRMT2-1 | shScr   | shPRMT2-1 | shPRMT2-1 |
| Lower               | 1/11    | 1/26      | 1/39      | 1/12    | 1/25      | 1/25      |
| Estimate            | 1/9     | 1/22      | 1/36      | 1/10    | 1/20      | 1/10      |
| Upper               | 1/8     | 1/18      | 1/22      | 1/8     | 1/17      | 1/17      |

b

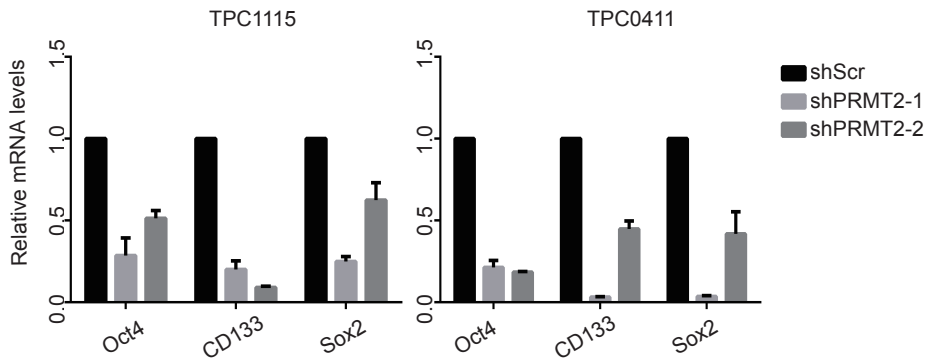

c

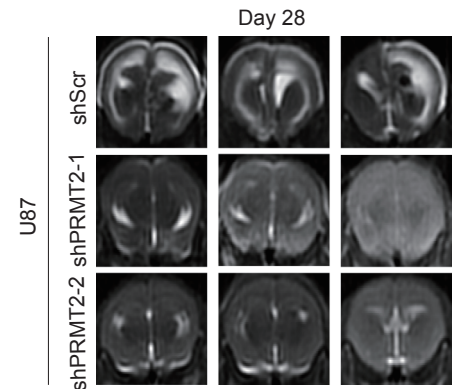

**Supplementary Fig. 5 (a)** Stem cell frequencies from GSCs with or without PRMT2

knockdown were estimated as the ratio  $1/x$  with the upper and lower 95% confidence intervals, where  $1$  = stem cell and  $x$  = all cells. **(b)** The mRNA levels of stem cell markers in TPC1115 and TPC0411 cells with shScr or shPRMT2. Error bars,  $\pm$  SD,  $n=2$ .

**(c)** MRI scanning of orthotopic tumors. Representative MRI images of brains of immunocompromised mice inoculated with control or PRMT2 knockdown U87 cells at day 28 post tumour implantation.

## Supplementary Fig.6

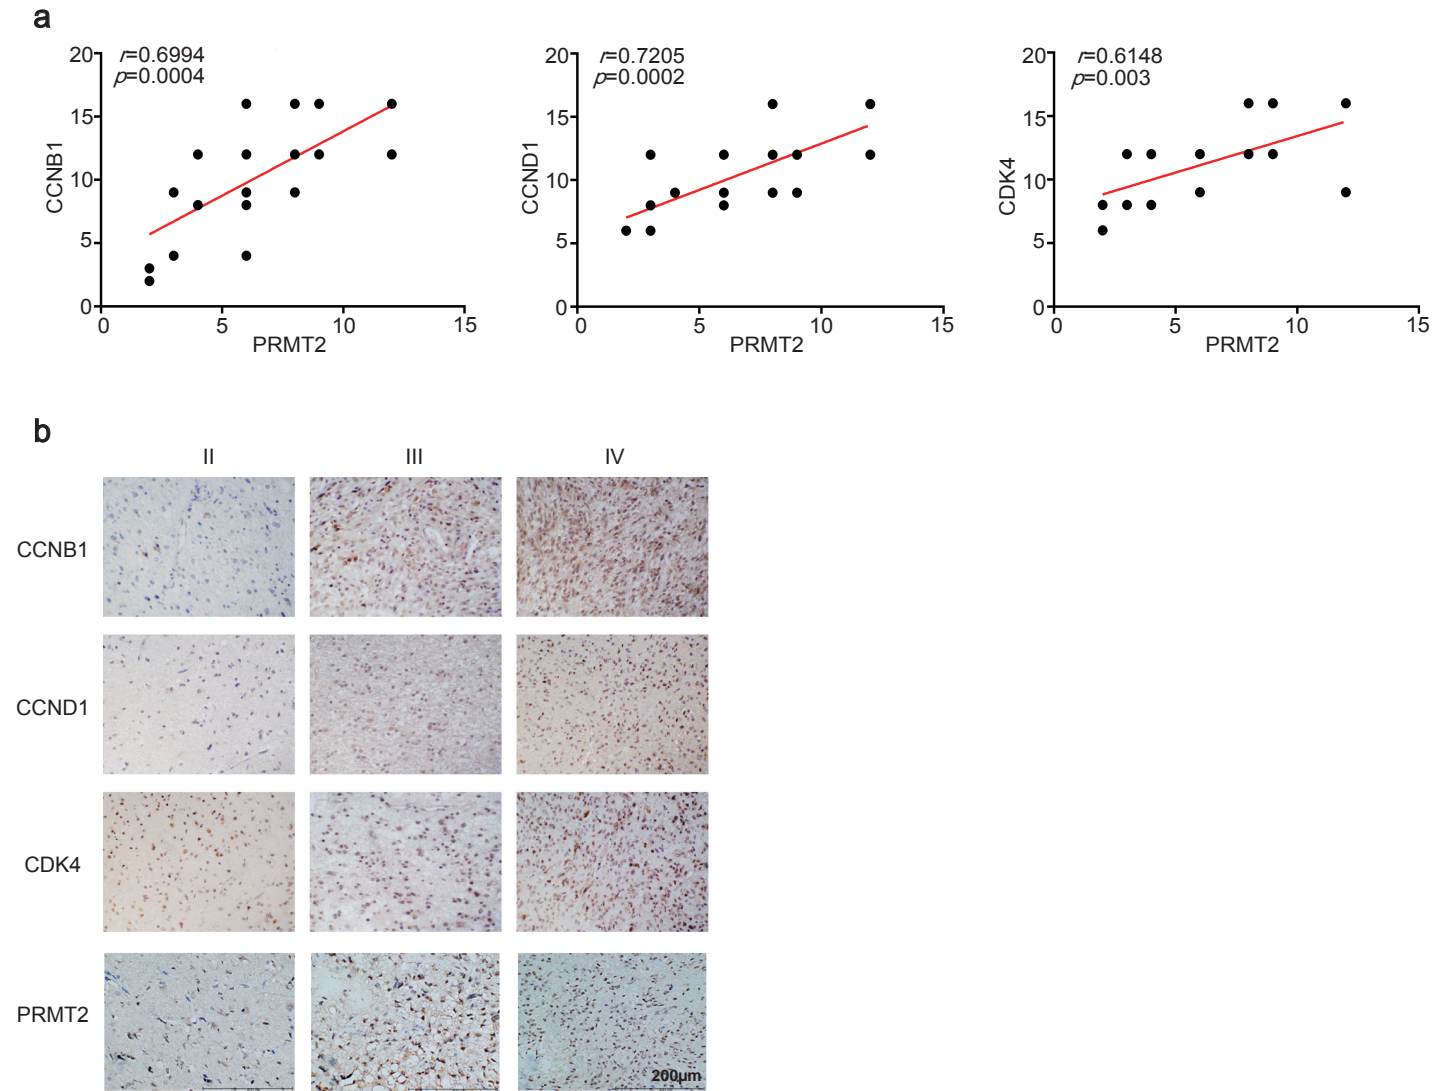

**Supplementary Fig. 6 (a)** Correlation between PRMT2 protein levels with CCNB1, CCND1 and CDK4 protein levels in glioma specimens. Tumor sections from 21 glioma specimens were IHC-stained with anti-CCNB1, CCND1 and CDK4 antibody. The significance of the correlation was determined by Pearson's correlation test. **(b)** Representative examples from IHC analysis of CCNB1, CCND1, CDK4 and PRMT2 protein levels in different grade of glioma specimens are shown. Scale bar, 200  $\mu\text{m}$ .

## Supplementary Fig.7

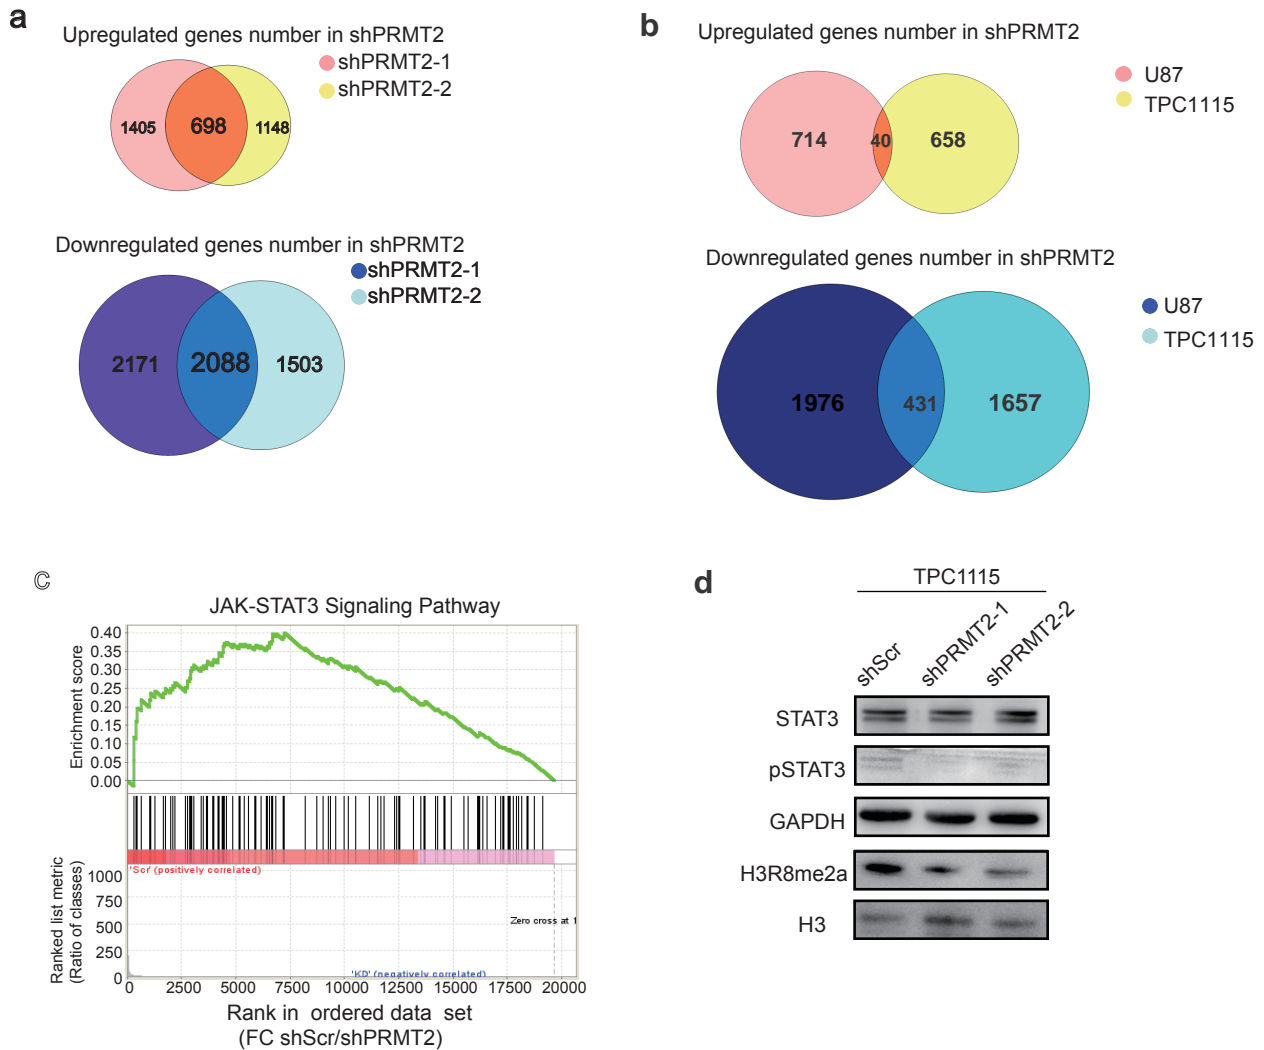

**Supplementary Fig. 7** The effects of PRMT2 knockdown in TPC1115 cells. **(a)** Venn diagrams show 698 upregulated genes with overlap in TPC1115 shPRMT2-1 compared with shPRMT2-2 (Top panel) and 2088 downregulated genes with overlap in TPC1115 shPRMT2-1 compared with shPRMT2-2 (Bottom panel). **(b)** Venn diagrams show 40 upregulated genes with overlap in U87 shPRMT2 compared with TPC1115 shPRMT2 (Top panel) and 431 downregulated genes with overlap in U87 shPRMT2 compared with TPC1115 shPRMT2 (Bottom panel). **(c)** GSEA analysis shows that JAK-STAT signaling pathway was significantly affected by PRMT2 knockdown in TPC1115. **(d)** Western blotting assays analyses the effects of PRMT2 knockdown on JAK-STAT pathway in TPC1115. GAPDH and H3 were used as loading controls.



## Supplementary Fig.8

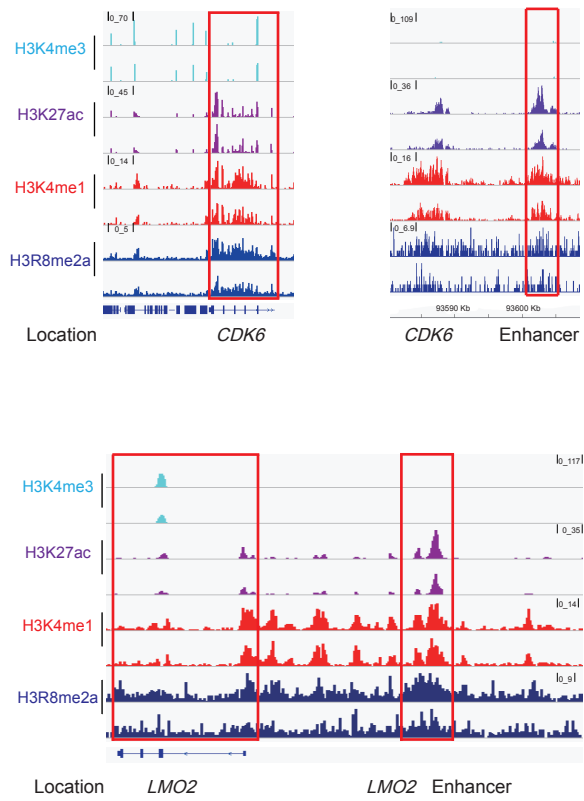

**Supplementary Fig. 8** Genomic snapshots of ChIP-seq analyses of representative genes in control and PRMT2 knockdown U87 cells.

## Supplementary Fig.9

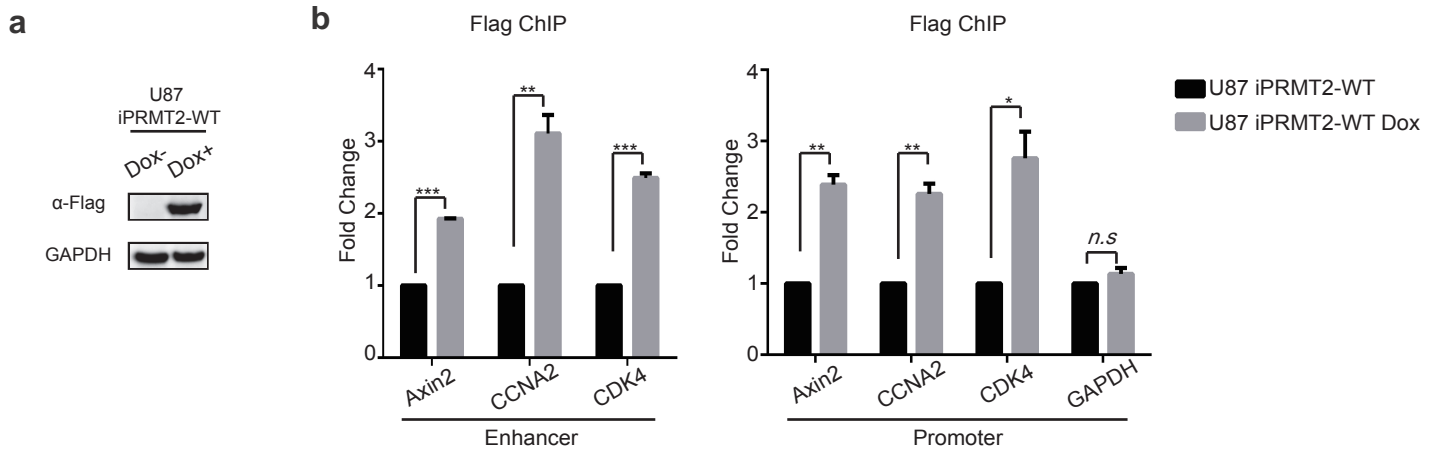

**Supplementary Fig. 9** ChIP-qPCR indicated PRMT2 can bind the Promoter and Enhancer regions of *AXIN2*, *CCNA2* and *CDK4* genes. Western blot analysis indicated the induced PRMT2-flag expression. Significance level was determined using Student's two-sided *t*-tests.

\* $p \leq 0.05$ , \*\* $p \leq 0.01$  and \*\*\* $p \leq 0.001$ .

## Supplementary Fig.10

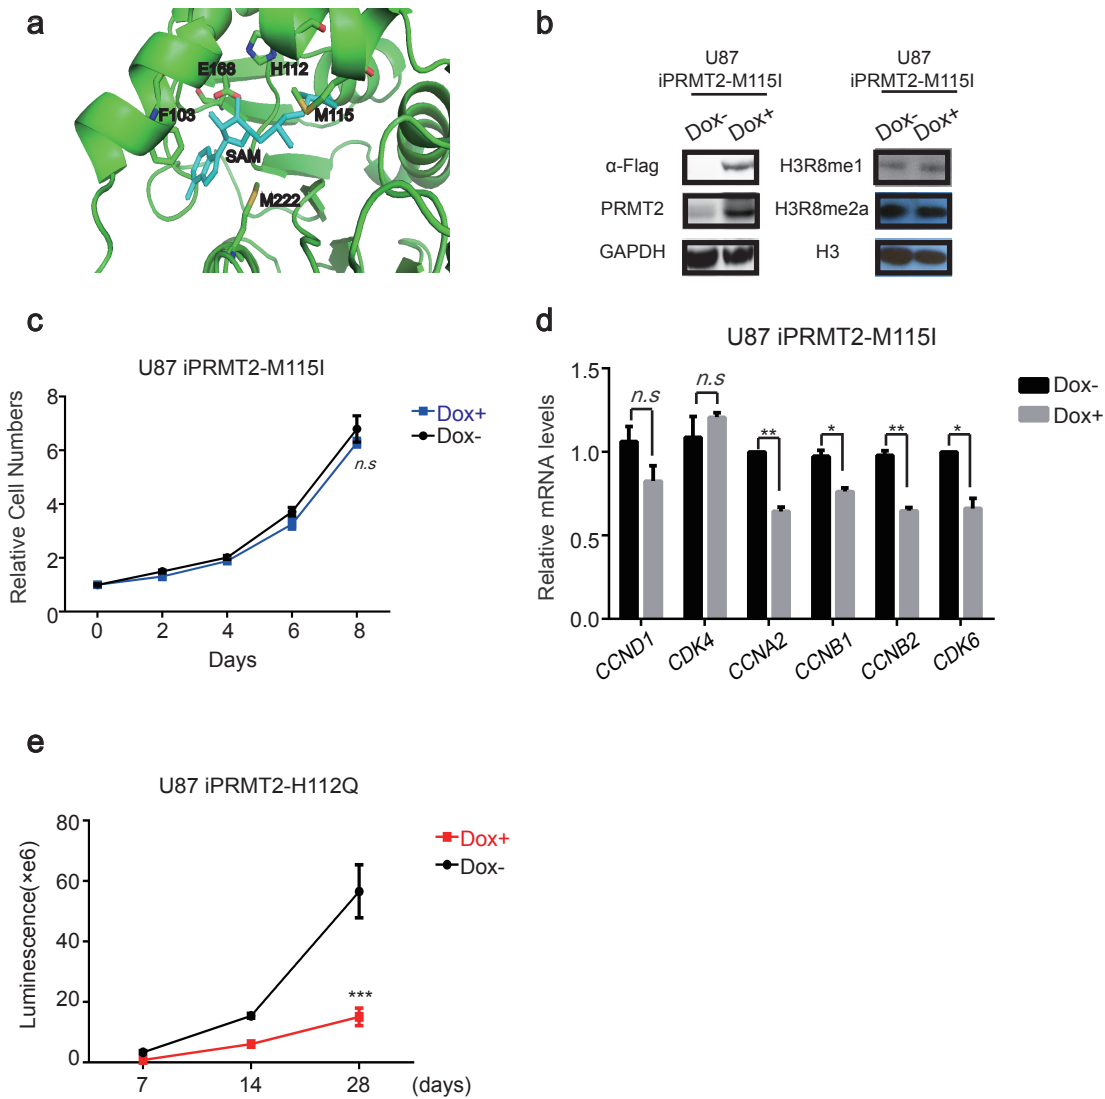

**Supplementary Fig. 10** Inducible expression of PRMT2-M115I does not affect H3R8me2a levels and protumorigenic functions. **(a)** Crystal structure of PRMT2 with enlarged residues critical for binding to SAM. **(b)** Cellular levels of PRMT2 and H3R8me2a in U87 and T98G cells with or without PRMT2-M115I expression. **(c)** Cell growth curves of U87 cells with or without PRMT2-M115I expression. Error bars,  $\pm$ SD,  $n=3$ . Significance level was determined using Student's two-sided  $t$ -tests. **(d)** RT-qPCR analyses of cell cycle associated genes in U87 cells with or without PRMT2-M115I expression. Significance level was determined using Student's two-sided  $t$ -tests.  $*p \leq 0.05$  and  $**p \leq 0.01$ . **(e)** The average signals of luciferase activity in implanted mice brains at different time points (mean  $\pm$  SD;  $n=6$ ). Significance level was determined using Student's two-sided  $t$ -tests.  $***p \leq 0.001$ .

# Supplementary Fig.11

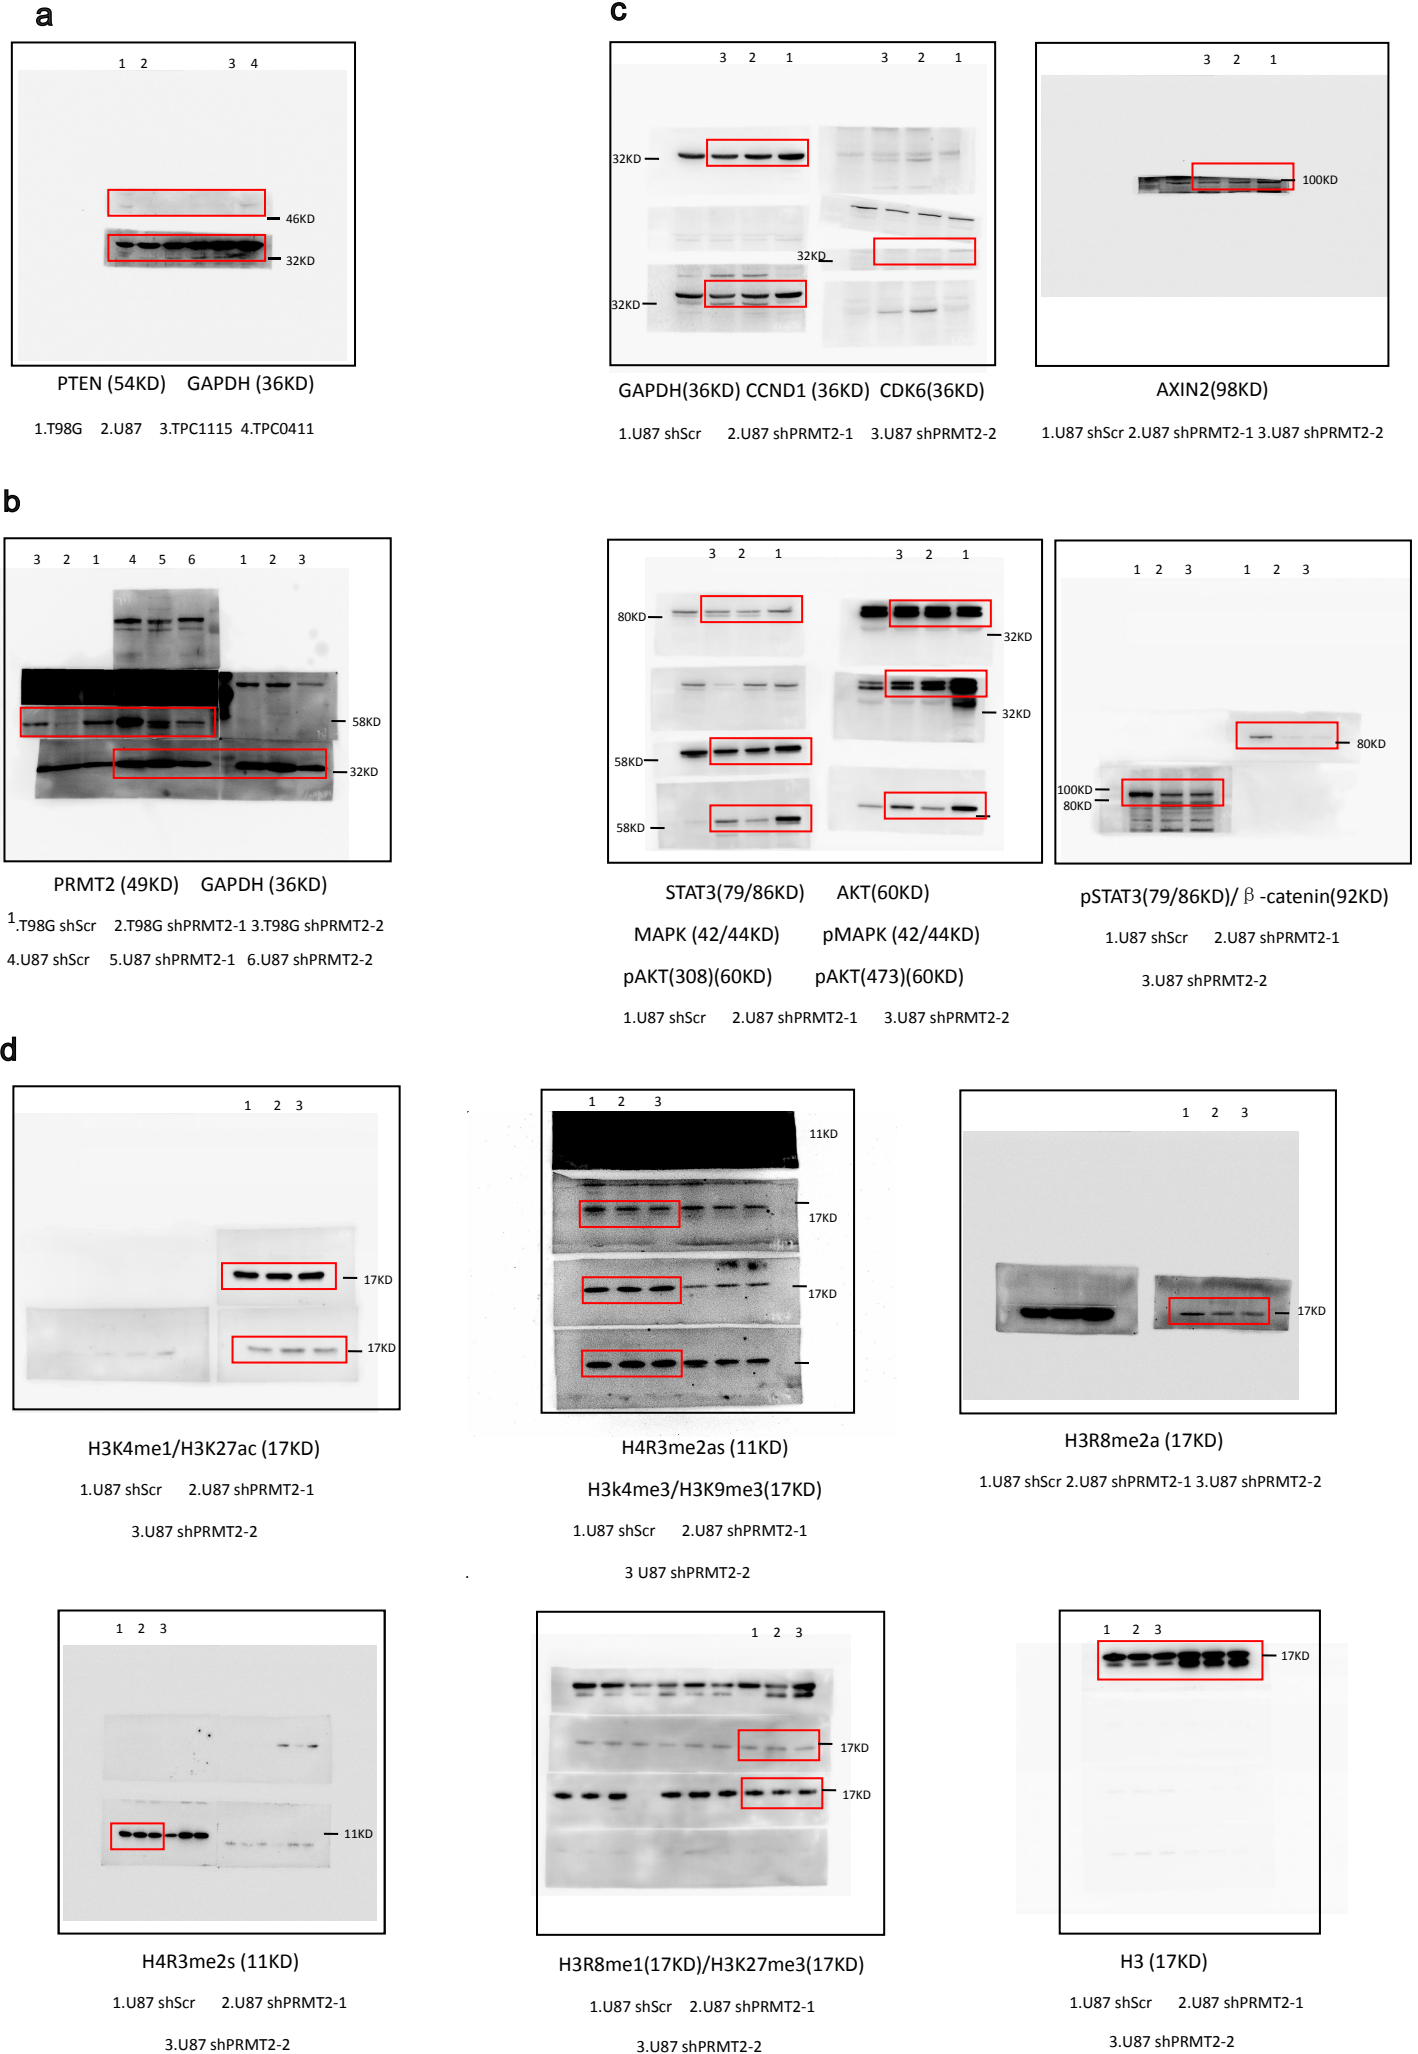

# Supplementary Fig.12

**a**

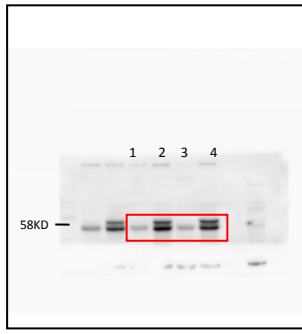

**PRMT2(49KD)**

- 1.U87 iPRMT2(H112Q) DOX-
- 2.U87 iPRMT2(H112Q) DOX+
- 3.U87 iPRMT2(M115I) DOX-
- 4.U87 iPRMT2(M115I) DOX+

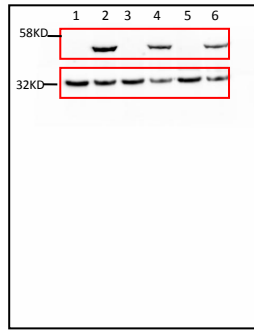

**Flag(49KD)  
GAPDH(37KD)**

- 1.U87 iPRMT2 WT DOX-
- 2.U87 iPRMT2 WT DOX+
- 3.U87 iPRMT2(H112Q) DOX-
4. U87 iPRMT2(H112Q) DOX+
- 5.U87 iPRMT2(M115I) DOX-
- 6.U87 iPRMT2(M115I) DOX+

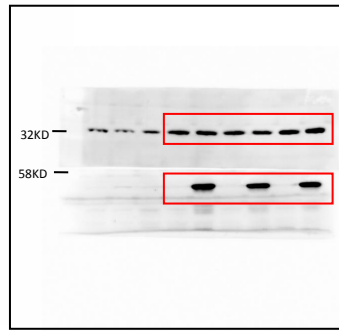

**GAPDH(36KD) PRMT2(49KD)**

- 1.T98G iPRMT2(H112Q) DOX-
2. T98G iPRMT2(H112Q) DOX+
- 3.T98G iPRMT2(M115I) DOX-
- 4.T98G iPRMT2(M115I) DOX+

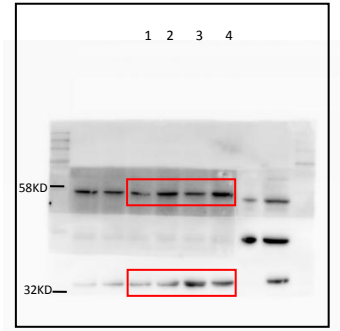

**Flag(49KD)/GAPDH(36KD)**

- 1.T98G iPRMT2(H112Q) DOX-
2. T98G iPRMT2(H112Q) DOX+
- 3.T98G iPRMT2(M115I) DOX-
- 4.T98G iPRMT2(M115I) DOX+

**b**

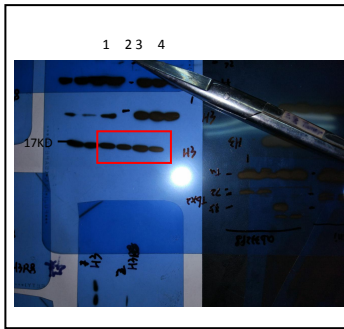

**H3(17KD)**

- 1.U87 iPRMT2(H112Q) DOX-
2. U87 iPRMT2(H112Q) DOX+
- 3.U87 iPRMT2(M115I) DOX-
- 4.U87 iPRMT2(M115I) DOX+

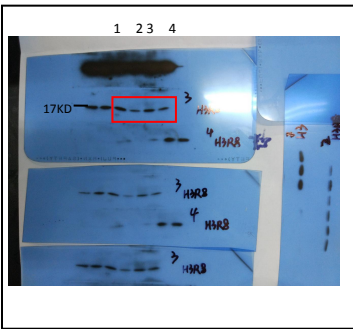

**H3R8me2a(17KD)**

- 1.U87 iPRMT2(H112Q) DOX-
2. U87 iPRMT2(H112Q) DOX+
- 3.U87 iPRMT2(M115I) DOX-
- 4.U87 iPRMT2(M115I) DOX+

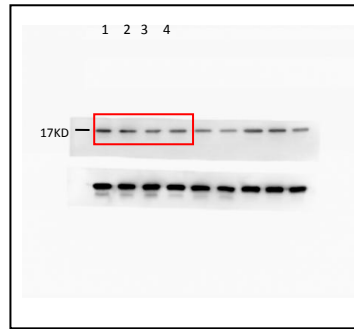

**H3R8me1(17KD)**

- 1.T98G iPRMT2(H112Q) DOX-
2. T98G iPRMT2(H112Q) DOX+
- 3.U87 iPRMT2(H112Q) DOX
- 4.U87 iPRMT2(H112Q) DOX+

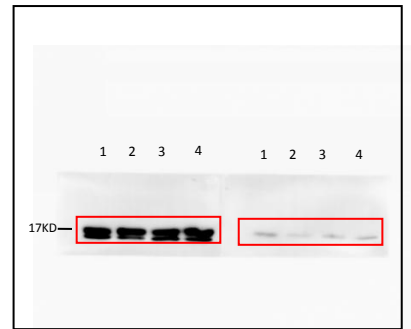

**H3(17KD)/H3Rme2a(17KD)**

- 1.T98G iPRMT2(H112Q) DOX-
2. T98G iPRMT2(H112Q) DOX+
- 3.T98G iPRMT2(M115I) DOX-
- 4.T98G iPRMT2(M115I) DOX+

**c**

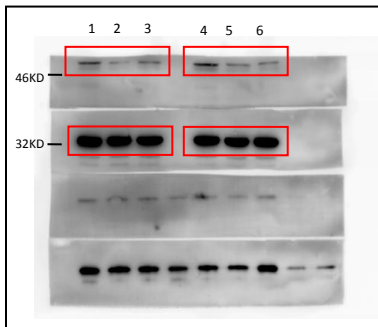

**PRMT2 (49KD) GAPDH(37KD)**

- 1.TPC1115 shScr
- 2.TPC1115 shPRMT2-1
- 3.TPC1115 shPRMT2-2
- 4.TPC0411 shScr
- 5.TPC0411 shPRMT2-1
- 6.TPC0411 shPRMT2-2

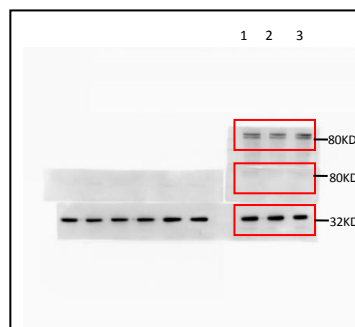

**STAT3(79/86KD) pSTAT3(79/86KD)**

- GAPDH(37KD)**
- 1.TPC1115 shScr
  - 2.TPC1115 shPRMT2-1
  - 3.TPC1115 shPRMT2-2

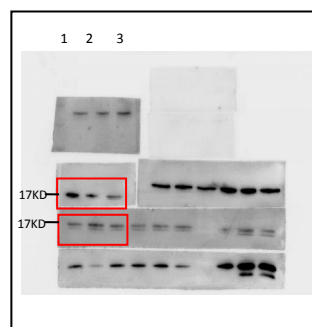

**H3R8me1(17KD) H3(17KD)**

- 1.TPC1115 shScr
- 2.TPC1115 shPRMT2-1
- 3.TPC1115 shPRMT2-2

**Supplementary Fig. 11** Uncropped scans of Western blots for Fig.1 to Fig.5. **(a)** Uncropped scans of Western blots for Fig.1e. **(b)** Uncropped scans of Western blots for Fig.2b (and Supplementary Fig.4a ). **(c)** Uncropped scans of Western blots for Fig.4f. **(d)** Uncropped scans of Western blots for Fig.5a.

**Supplementary Fig. 12** Uncropped scans of Western blots for Fig.7 and Supplementary Fig. **(a)** and **(b)** Uncropped scans of Western blots for Fig.7c ,Supplementary Fig.9a and Supplementary Fig.10b. **(c)** Uncropped scans of Western blots for Supplementary Fig.4b and Supplementary Fig.7d.

**Supplementary Table 1. Clinical information on the 21 glioma patients**

| <b>Patient samples</b> | <b>Sex</b> | <b>Age (yrs)</b> | <b>Laterality</b> | <b>Grade</b> | <b>survival time (months)</b> |
|------------------------|------------|------------------|-------------------|--------------|-------------------------------|
| 1                      | F          | 48               | Right             | III          | 13                            |
| 2                      | F          | 32               | Right             | IV           | 12                            |
| 3                      | M          | 53               | Right             | III          | 26                            |
| 4                      | M          | 35               | Left              | III          | 18                            |
| 5                      | M          | 26               | Left              | II           | 24                            |
| 6                      | F          | 49               | Right             | II           | 28                            |
| 7                      | F          | 64               | Right             | III          | 3                             |
| 9                      | M          | 44               | Left              | III          | 12                            |
| 10                     | F          | 44               | Right             | IV           | 5                             |
| 11                     | M          | 24               | Right             | IV           | 12                            |
| 12                     | F          | 64               | Right             | IV           | 7                             |
| 13                     | F          | 37               | Left              | II           | 12                            |
| 14                     | F          | 47               | Right             | III          | 6                             |
| 15                     | F          | 41               | Right             | III          | 10                            |
| 16                     | F          | 76               | Right             | II           | 8                             |
| 17                     | F          | 26               | Right             | III          | 8                             |
| 18                     | F          | 38               | Right             | IV           | 6                             |
| 19                     | M          | 49               | Right             | III          | 6                             |
| 20                     | M          | 65               | Left              | III          | 7                             |
| 23                     | F          | 54               | Left              | III          | 8                             |
| 24                     | F          | 38               | Left              | II           | 6                             |

M: male

F: female

**Supplementary Table 2. Primer sequences and antibodies**

|                       | <b>shRNA Oligonucleotides</b> |
|-----------------------|-------------------------------|
| Non-targeting control | 5'-GAAUACGUACCCCAUUAUA-3'     |
| PRMT1                 | 5'-GTGTTCCAGTATCTCTGATTA-3'   |
| PRMT2 #1              | 5'-CCAGCCACGAACAATAAATA-3'    |
| PRMT2 #2              | 5'-GAACGGCTTTGCTGACATCAT-3'   |
| PRMT3                 | 5'-CCTTGGGAGAAAGAAGAGTAT-3'   |
| PRMT4                 | 5'-CTATGACTTGAGCAGTGTTAT-3'   |
| PRMT5                 | 5'-GCCCAGTTTGAGATGCCTTAT-3'   |
| PRMT6                 | 5'-CACCGGCATTCTGAGCATCTT-3'   |
| PRMT7                 | 5'-GCCTCAAGAGATCCTGACTTT-3'   |
| PRMT8                 | 5'-GCTATCGTTCACATCTGCATT-3'   |
| PRMT9                 | 5'-GCTGGCACTTTATCATGCTTA-3'   |



**Primers used for qPCR**

|       |                                         |
|-------|-----------------------------------------|
| PRMT1 | forward: 5'-GCGGTGAAGATCGTCAAAGC-3'     |
|       | reverse: 5'-GACTCGTAGAAGAGGCAGTA-3'     |
| PRMT2 | forward: 5'-TCTCTTCTGTGCACACTATG-3'     |
|       | reverse: 5'-GGCAGCACCACATCCTCCAC-3'     |
| PRMT3 | forward: 5'-CTTCGCCCCAGCTTTA-3'         |
|       | reverse: 5'-TACGGGCATTATGGGAT-3'        |
| PRMT4 | forward: 5'-GATGAACAGCTCTACATGGA-3'     |
|       | reverse: 5'-AGGCTGCCGAAATACTCAT-3'      |
| PRMT5 | forward: 5'-GAAAAGGACCCCATCAAATA-3'     |
|       | reverse: 5'-ATTGGTATCCTTCTCCTCTT-3'     |
| PRMT6 | forward: 5'-TCCTGCCGGGACCAGTGGAG-3'     |
|       | reverse: 5'-ACCGCCCTCCTTCAGCCACT-3'     |
| PRMT7 | forward: 5'-ACCTGCTCTGGAACCGGCCT-3'     |
|       | reverse: 5'-GGTGATGGGCCAGCACGGAG-3'     |
| PRMT8 | forward: 5'-GTTTCCAGACCGGGCAGCTT-3'     |
|       | reverse: 5'-TCCACGATGTCCACTAGAGG-3'     |
| PRMT9 | forward: 5'-TGCTGATGTTTGGGTTGCTT-3'     |
|       | reverse: 5'-CGTTCTGTTCCCTTGAACAGC-3'    |
| AXIN2 | forward: 5'-AGTGTGAGGTCCACGGAAAC-3'     |
|       | reverse: 5'-CTTCACACTGCGATGCATTT-3'     |
| CCND1 | forward: 5'-CCGTCCATGCGGAAGATC-3'       |
|       | reverse: 5'-ATGGCCAGCGGGAAGAC-3'        |
| CCNA2 | forward: 5'-CCTCCTTGAAAAGCAAACAGT-3'    |
|       | reverse: 5'-CAGGGCATCTTCACGCTCTAT-3'    |
| CCNB1 | forward: 5'-TGCTTATCTGAGACAACCTGAGGA-3' |
|       | reverse: 5'-ACCAATTTCTGGAGGGTACATTT-3'  |
| CCNB2 | forward: 5'-CAACCCACCAAAAACAACAATG-3'   |
|       | reverse: 5'-CAATCTTCGTTATCAATGTCCTCG-3' |
| CDK4  | forward: 5'-CCATCAGCACAGTTCGTGAGGT-3'   |
|       | reverse: 5'-TCAGTTCGGGATGTGGCACAGA-3'   |
| CDK6  | forward: 5'-TGGTCAGGTTGTTTGATGTGTG-3'   |
|       | reverse: 5'-GAAGTCAGCGAGTTTTATTTGTCC-3' |
| TIAM1 | forward: 5'-AAGACGTACTCAGGCCATGTCC-3'   |
|       | reverse: 5'-GACCCAAATGTCGCAGTCAG-3'     |

|                |                                         |
|----------------|-----------------------------------------|
| DKK3           | forward: 5'-TCATCAGAAGTGAACCTGGCAA-3'   |
|                | reverse: 5'-CTTCTGCCTTCTTCGTCTCCC-3'    |
| GAPDH          | forward: 5'-GCACCGTCAAGGCTGAGAAC-3'     |
|                | reverse: 5'-TGGTGAAGACGCCAGTGGA-3'      |
| RPO            | forward: 5'-TTCATTGTGGGAGCAGAC-3'       |
|                | reverse: 5'-CAGCAGTTTCTCCAGAGC-3'       |
| AXIN2 promoter | forward: 5'-CTGGAGCCGGCTGCGCTTTGATAA-3' |
|                | reverse: 5'-CGGCCCCGAAATCCATCGCTCTGA-3' |
| CCNA2 promoter | forward: 5'-CAGGGTCCC GCGCTGCTC-3'      |
|                | reverse: 5'-TGGCGCCAGTTTTTCGGGGT-3'     |
| CDK4 promoter  | forward: 5'-CACACTGGAAGCAAGCACTCAG-3'   |
|                | reverse: 5'-TGATGCTGTCACCTTTTCGCT-3'    |
| AXIN2 enhancer | forward: 5'- AGTAAGCAACCCTCACCTGC-3'    |
|                | reverse: 5'-ACTCACTCTTCCCCCAAAGC-3'     |
| CCNA2 enhancer | forward: 5'-TCTCCTTGTCACAGATAATGC-3'    |
|                | reverse: 5'-TCAACACCGACCTTACTTTCAT-3'   |
| CDK4 enhancer  | forward: 5'-GGTTGGTTCTGGGTTAGGC-3'      |
|                | reverse: 5'-AGCCTGCTTCCCTCATTGTC-3'     |
| GAPDH promoter | forward: 5'-GCCACATCGCTCAGACAC-3'       |
|                | reverse: 5'-CATACGACTGCAAAGACCC-3'      |

#### Primers used for cloning and mutation

|               |                                                |
|---------------|------------------------------------------------|
| PRMT2 cloning | forward: 5'-ATGGCAACATCAGGTGACTG-3'            |
|               | reverse: 5'-TCATCTCCAGATGGGGAAGA-3'            |
| PRMT2(H112Q)  | forward: 5'-GAAACTCCAGTTGGAGATGTTGGCAGACCA-3'  |
|               | reverse: 5'-CTGGAGTTTCAGAGTTCATAGCTGCCGAAG-3'  |
| PRMT2(M115I)  | forward: 5'-CTTGGAGATATTGGCAGACCAGCCACGAAC-3'  |
|               | reverse: 5'-GGTCTGCCAATATCTCCAAGTGGAGTTTCAG-3' |

| <b>Antibodies</b>            | <b>Source</b>             | <b>Identifier</b> | <b>Application</b> | <b>Concentration used</b> |
|------------------------------|---------------------------|-------------------|--------------------|---------------------------|
| PRMT2                        | LifeSpan BioSciences      | Cat#L482512       | IB                 | 1:1000                    |
| PRMT2                        | Santa Cruz Biotechnology  | Sc-393254         | IF,IHC             | 1:100,1:100               |
| GAPDH                        | Abw ays                   | Cat#ab0037        | IB                 | 1:5000                    |
| Histone H3                   | Millipore                 | Cat#07-690        | IB                 | 1:4000                    |
| AKT(pan)                     | Cell Signaling Technology | Cat#4691          | IB                 | 1:1000                    |
| p-AKT(Thr308)                | Cell Signaling Technology | Cat#13038         | IB                 | 1:1000                    |
| p-AKT(Ser473)                | Cell Signaling Technology | Cat#4060          | IB                 | 1:1000                    |
| MAPK                         | Cell Signaling Technology | Cat#4695          | IB                 | 1:1000                    |
| p-MAPK(Thr202/Tyr204)        | Cell Signaling Technology | Cat#4370          | IB                 | 1:1000                    |
| STAT3                        | Abw ays                   | Cat#CY5165        | IB                 | 1:1000                    |
| p-STAT3                      | Abw ays                   | Cat#CY6566        | IB                 | 1:1000                    |
| AXIN2                        | Absin                     | Cat#abs125590a    | IB                 | 1:500                     |
| CCND1                        | Absin                     | Cat#abs130610     | IB,IHC             | 1:1000,1:100              |
| CDK6                         | Wanleibio                 | Cat#w l01676a     | IB                 | 1:1000                    |
| CDK4                         | Wanleibio                 | Cat#w l02274      | IHC                | 1:200                     |
| CCNB1                        | Santa Cruz Biotechnology  | SC-245            | IB,IHC             | 1:1000,1:200              |
| $\beta$ -catenin             | Abcam                     | Cat#ab32572       | IB                 | 1:1000                    |
| $\alpha$ -Flag               | Sigma-Aldrich             | Cat#F7425         | IB,ChIP            | 1:2000                    |
| PTEN                         | Cell Signaling Technology | Cat#9188          | IB                 | 1:1000                    |
| H3K4me1                      | Cell Signaling Technology | Cat#5326          | IB,ChIP            | 1:1000                    |
| H3K4me3                      | Cell Signaling Technology | Cat#9751          | IB,ChIP            | 1:1000                    |
| H3K27me3                     | Cell Signaling Technology | Cat#9733          | IB,ChIP            | 1:1000                    |
| H3K27ac                      | Abcam                     | Cat#ab45173       | IB,ChIP            | 1:1000                    |
| H3R8me2a                     | Novus Biologicals         | Cat#NB21-1062     | IB,IF,IHC,ChIP     | 1:1000,1:500,1:500        |
| H3K9me3                      | Cell Signaling Technology | Cat#13969         | IB,ChIP            | 1:1000                    |
| H4R3me2a                     | PTM-Biolab                | Cat#PTM-667       | IB                 | 1:1000                    |
| H4R3me2s                     | PTM-Biolab                | Cat#PTM-639       | IB                 | 1:1000                    |
| H3R8me1                      | PTM-Biolab                | Cat#PTM-686       | IB                 | 1:1000                    |
| Normal rabbit IgG antibody   | Cell Signaling Technology | Cat#2729          | ChIP               |                           |
| Anti-rabbit IgG, HRP-linked  | Cell Signaling Technology | Cat#7074          | IB                 | 1:4000                    |
| Anti-mouse IgG, HRP-linked   | Cell Signaling Technology | Cat#7076          | IB                 | 1:3000                    |
| Anti-rabbit IgG, FITC-linked | ZSBIO                     | 15176-1-AP        | IF                 | 1:200                     |
