# Supplementary material for: PRMT2 links histone H3R8 asymmetric dimethylation to oncogenic activation and tumorigenesis of glioblastoma
Source: PubMed Central journal article supplement (PMC6208368; doi:10.1038/s41467-018-06968-7), 2018-10-31
Supplement: 41467_2018_6968_MOESM3_ESM.pdf [file 41467_2018_6968_MOESM3_ESM.pdf]

## **Description of Additional Supplementary Files**

File Name: Supplementary Data 1

Description: The differentially expressed genes (DEGs) in shPRMT2-1 and shPRMT2 compared with shScr (fold change $\geq$ 2 and FDR $\leq$ 0.05) in U87.

File Name: Supplementary Data 2

Description: Differentially expressed genes in shPRMT2-1 compared with shScr in TPC1115 (fold change $\geq$ 2 and FDR $\leq$ 0.05).
